# Supplementary material for: Periodontal condition in growing subjects with Marfan Syndrome: a case-control study
Source: PeerJ. 2019 Apr 23;7:e6606. doi: 10.7717/peerj.6606 (PMC6485202; doi:10.7717/peerj.6606)
Supplement: Supplemental Information 1 — Raw data analysed for the study [file peerj-07-6606-s001.xlsx]

## Sheet: Foglio1
marfan gruop (MG)
	age	sex	dentition	PLI	BOP	PSR U 1	PSR U 2	PSR U 3	PSR L 1	PSR L 2	PSR L 3
D.P.	7	M	m	0.34	0.15	0	1	0	0	1	0
C.M.	13	M	d	0.75	0.37	3	2	3	2	3	2
C.C.	7	M	m	0.81	0.37	1	2	1	1	2	1
C.G.	14	M	d	0.68	0.39	3	2	3	3	3	3
D.M.	11	F	d	0.67	0.43	1	2	2	2	2	2
T.M.	5	M	m	0.66	0.47	1	1	2	1	2	1
R.A.	9	F	m	0.59	0.4	1	2	1	1	2	1
D.A.	9	M	m	0.71	0.51	1	2	1	2	2	2
B.S
B.M	8	F	m	0.75	0.36	1	2	2	1	1	2
B.S.	11	M	d	0.66	0.23	0	1	0	2	1	1
D.A.	7	F	m	0.3	0.15	2	1	1	1	1	1
G.A.	12	F	d	0.51	0.41	3	2	2	2	2	3
M.L.	8	M	m	0.5	0.37	2	2	2	2	2	2
D.I.	10	F	m	0.3	0.23	3	2	3	3	1	2
D.A.	9	M	m	0.55	0.45	1	2	2	2	1	1
G.C.	10	F	m	0.61	0.45	2	2	2	3	2	2
	9.375			0.586875	0.35875	1.5625	1.75	1.6875	1.75	1.75	1.625
	2.34187
Control Group (GC)
	age	sex	dentition	PLI	BOP	PSR U 1	PSR U 2	PSR U 3	PSR L 1	PSR L 2	PSR L 3
C.S.	9	F	m	0.35	0.12	0	1	0	0	1	0
A.B.	8	M	m	0.37	0.25	0	2	0	0	2	0
E.R.	11	F	d	0.37	0.28	0	1	0	0	2	0
L.C.	11	F	d	0.14	0.05	1	0	1	0	1	0
T.G.	7	M	m	0.33	0.16	0	1	0	0	1	0
L.D.	9	F	m	0.27	0.16	0	1	0	0	1	0
E.F.	13	F	d	0.11	0.01	0	0	0	0	0	0
C.E.	7	M	m	0.25	0.19	0	1	0	0	1	0
S.G.	15	F	d	0.19	0.03	0	0	0	1	1	1
E.T.	14	F	d	0.05	0	0	0	0	0	0	0
B.A.	11	M	d	0.16	0.02	1	0	0	1	0	1
C.A.	14	F	d	0.18	0.16	1	0	1	1	0	1
C.L.	14	M	d	0.15	0.06	1	0	1	1	1	0
B.M.	8	M	m	0.2	0.11	0	0	1	1	0	1
S.M.	7	F	m	0.26	0.05	1	0	0	0	0	1
A.R.	15	M	d	0.05	0	0	0	0	1	0	0
S.M.	5	F	m	0.04	0	0	0	0	0	0	0
M.R.	8	F	m	0.3	0.09	0	1	1	1	0	1
B.A.	8	M	m	0.18	0.09	0	1	0	0	0	0
D.R.	7	F	m	0.16	0.04	1	0	1	1	0	1
				0.2055	0.16	0.3	0.45	0.3	0.4	0.55	0.35
	10.05

## Sheet: Foglio2
	age	sex	PLI	BOP	PSR U 1	PSR U 2	PSR U 3	PSR L 1	PSR L 2	PSR L 3	Gruppo
D.P.	7	M	0.34	0.15	0	1	0	0	1	0	0
C.M.	13	M	0.75	0.37	3	2	3	2	3	2	0
C.C.	7	M	0.81	0.37	1	2	1	1	2	1	0
C.G.	14	M	0.68	0.39	3	2	3	3	3	3	0
D.M.	11	F	0.67	0.43	1	2	2	2	2	2	0
T.M.	5	M	0.66	0.47	1	1	2	1	2	1	0
R.A.	9	F	0.59	0.4	1	2	1	1	2	1	0
D.A.	9	M	0.71	0.51	1	2	1	2	2	2	0
B.S											0
B.M	8	F	0.75	0.36	1	2	2	1	1	2	0
B.S.	11	M	0.66	0.23	0	1	0	2	1	1	0
D.A.	7	F	0.3	0.15	2	1	1	1	1	1	0
G.A.	12	F	0.51	0.41	3	2	2	2	2	3	0
M.L.	8	M	0.5	0.37	2	2	2	2	2	2	0
D.I.	10	F	0.3	0.23	3	2	3	3	1	2	0
D.A.	9	M	0.55	0.45	1	2	2	2	1	1	0
G.C.	10	F	0.61	0.45	2	2	2	3	2	2	0
C.S.	9	F	0.35	0.12	0	1	0	0	1	0	1
A.B.	8	M	0.37	0.25	0	2	0	0	2	0	1
E.R.	11	F	0.37	0.28	0	1	0	0	2	0	1
L.C.	11	F	0.14	0.05	1	0	1	0	1	0	1
T.G.	7	M	0.33	0.16	0	1	0	0	1	0	1
L.D.	9	F	0.27	0.16	0	1	0	0	1	0	1
E.F.	13	F	0.11	0.01	0	0	0	0	0	0	1
C.E.	7	M	0.25	0.19	0	1	0	0	1	0	1
S.G.	15	F	0.19	0.03	0	0	0	1	1	1	1
E.T.	14	F	0.05	0	0	0	0	0	0	0	1
B.A.	11	M	0.16	0.02	1	0	0	1	0	1	1
C.A.	14	F	0.18	0.16	1	0	1	1	0	1	1
C.L.	14	M	0.15	0.06	1	0	1	1	1	0	1
B.M.	8	M	0.2	0.11	0	0	1	1	0	1	1
S.M.	7	F	0.26	0.05	1	0	0	0	0	1	1
A.R.	15	M	0.05	0	0	0	0	1	0	0	1
S.M.	5	F	0.04	0	0	0	0	0	0	0	1
M.R.	8	F	0.3	0.09	0	1	1	1	0	1	1
B.A.	8	M	0.18	0.09	0	1	0	0	0	0	1
D.R.	7	F	0.16	0.04	1	0	1	1	0	1	1

## Sheet: Tabella
		Test for independent samples
				Levene test of variance equality		T test of equality of means
											Intervallo di confidenza per la differenza al 95%
				F	Sig.	t	df	Sig. (2-code)	Difference between averages	difference between standard error	Inf	sup
		PLI	Assume equal variances	2.89644	0.0979038	8.61814	34	4.54806e-10	0.381375	0.0442526	0.291443	0.471307
			Not Assume equal variances			8.22685	24.6431	1.56846e-08	0.381375	0.0463574	0.28583	0.47692
		BOP	Assume equal variances	0.723434	0.40097	8.20006	34	1.44558e-09	0.26525	0.0323473	0.199512	0.330988
			not Assume equal variances			7.95051	27.3964	1.36567e-08	0.26525	0.0333627	0.196842	0.333658

## Sheet: Tabella 2
		Test for independent samples
				Levene test of variance equality		T test of equality of means
											CI 95%
				F	Sig.	t	df	Sig. (2-code)	Differenza between averages	Differece standard error	inf	sup
		PSR U 1	Assume equal variances	15.6372	0.000368972	4.89093	34	2.37766e-05		0.258131	0.737915	1.78708
			Not Assume equal variances			4.53624	19.9719	0.000201702	1.2625	0.278314	0.681894	1.84311
		PSR U 2	Assume equal variances	4.40471	0.0433416	7.16465	34	2.76642e-08	1.3	0.181446	0.931257	1.66874
			Not Assume equal variances			7.4087	33.83	1.408e-08	1.3	0.175469	0.943337	1.65666
		PSR U 3	Assume equal variances	7.6317	0.00918625	5.74351	34	1.85497e-06	1.3875	0.241577	0.896557	1.87844
			Not Assume equal variances			5.35869	20.8648	2.63763e-05	1.3875	0.258925	0.848823	1.92618
		PSR L 1	Assume equal variances	3.58522	0.0668314	5.9043	34	1.14644e-06	1.35	0.228647	0.885334	1.81467
			Not Assume equal variances			5.58324	23.0265	1.10654e-05	1.35	0.241795	0.84984	1.85016
		PSR L 2	Assume equal variances	0.153039	0.698089	5.22353	34	8.80728e-06	1.2	0.22973	0.733133	1.66687
			Not Assume equal variances			5.22633	32.3519	9.98462e-06	1.2	0.229607	0.732506	1.66749
		PSR L 3	Assume equal variances	4.84021	0.0346988	5.86145	34	1.3032e-06	1.275	0.217523	0.83294	1.71706
			Not Assume equal variances			5.55933	23.5313	1.08793e-05	1.275	0.229344	0.801158	1.74884
